# Supplementary material
Source: PubMed Central journal article supplement (PMC4527992)
Supplement: NIHMS710121-supplement-01.pdf [file NIHMS710121-supplement-01.pdf]

**Table 1S.** Concentrations of flavonoids and alkaloids in the *Hydrastis canadensis* leaf extract

| Constituent                                                  | Concentration (mM) $\pm$ SD |
|--------------------------------------------------------------|-----------------------------|
| Berberine                                                    | 8.0 $\pm$ 0.1               |
| Hydrastine                                                   | 2.61 $\pm$ 0.05             |
| Canadine                                                     | 0.054 $\pm$ 0.008           |
| Sideroxylin                                                  | 0.173 $\pm$ 0.036           |
| 6-Desmethyl-sideroxylin/8-desmethyl-sideroxylin <sup>a</sup> | 1.59 0.27                   |

a. The isomeric flavonoids 6-desmethyl-sideroxylin and 8-desmethyl-sideroxylin coeluted and were quantified as a mixture.

**Table 2S.** Minimum inhibitory concentration of *H. canadensis* alkaloids against several strains of MRSA.

| Alkaloid   | <i>Minimum inhibitory concentration (MIC, <math>\mu</math>g/mL)</i> |               |            |
|------------|---------------------------------------------------------------------|---------------|------------|
|            | <i>TCH1516</i>                                                      | <i>AH1263</i> | <i>LAC</i> |
| Berberine  | 150                                                                 | 300           | >300       |
| Canadine   | >300                                                                | >300          | >300       |
| Hydrastine | >300                                                                | >300          | >300       |

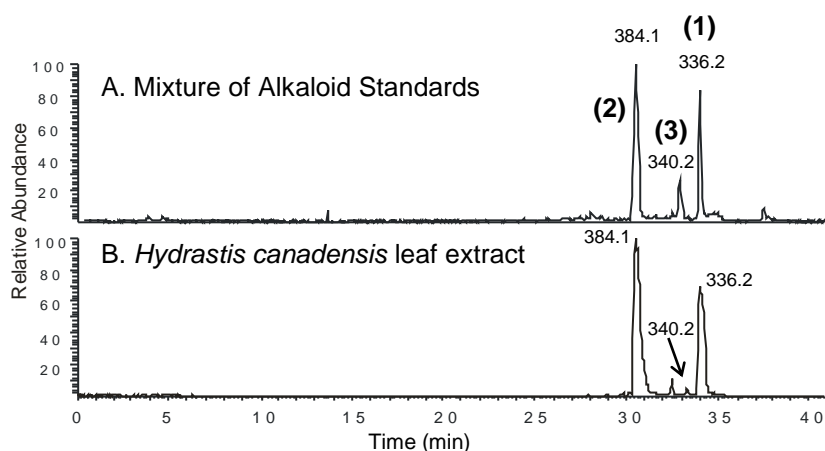

Figure 1S. Comparison of base peak LC-MS chromatograms (positive ion mode) for an equimolar mixture of the standard alkaloids berberine, hydrastine and canadine at 1  $\mu\text{M}$  (A) and a 100-fold dilution of a ethanolic extract from the aerial portions of goldenseal (*Hydrastis canadensis*) (B). Peaks are labeled with the  $m/z$  value of the ion detected, which was consistent with  $\text{M}^+$  for berberine **(1)** (monoisotopic mass of 336.12 g/mole), and  $\text{MH}^+$  for hydrastine **(2)** and canadine **(3)** (monoisotopic masses of 384.14 and 340.15 g/mole, respectively). The bold numbers in (A) correspond to the structures in Figure 3 of the main manuscript.
